# Supplementary material for: Novel subtype of mucopolysaccharidosis caused by arylsulfatase K (ARSK) deficiency
Source: PubMed Central journal article supplement — J Med Genet. 2021 Dec 16;59(10):957–64. doi: 10.1136/jmedgenet-2021-108061 (PMC9554054; doi:10.1136/jmedgenet-2021-108061), 2021-12-16
Supplement: jmedgenet-2021-108061supp001.pdf [file jmedgenet-2021-108061supp001.pdf]

## Supplementary file

### **Novel subtype of mucopolysaccharidosis caused by arylsulfatase K (ARSK) deficiency**

Sarah Verheyen, Jasmin Blatterer, Michael R. Speicher, Gandham SriLakshmi Bhavani, Geert-Jan Boons, Mai-Britt Ilse, Dominik Andrae, Jens Sproß, Frédéric M. Vaz, Susanne Gerit Kircher, Laura Posch-Pertl, Daniela Baumgartner, Torben Lübke, Hitesh Shah, Ali Al Kaissi, Katta M. Girisha,\* Barbara Plecko\*

#### Author information

Ali Al Kaissi, Katta M. Girisha and Barbara Plecko contributed equally as last authors.  
Katta M. Girisha and Barbara Plecko share corresponding authorship.

#### \*corresponding authors

barbara.plecko@medunigraz.at

Division of General Pediatrics, Department of Pediatrics and Adolescent Medicine, Medical University of Graz, 8036 Graz, Austria

girish.katta@manipal.edu

Department of Medical Genetics, Kasturba Medical College, Manipal, Manipal Academy of Higher Education, Manipal, India, 576104

|                                                                                                             |   |
|-------------------------------------------------------------------------------------------------------------|---|
| Figure S1: The role of ARSK in heparan sulfate degradation as an example for GAG degradation .....          | 2 |
| Figure S2: Conserved sulfatase signature .....                                                              | 3 |
| Figure S3: Functional consequences of ARSK variants - additional measurements .....                         | 4 |
| Figure S4: Progression of skeletal dysplasia – hands of S1-4 at different ages .....                        | 5 |
| Figure S5: Progression of skeletal dysplasia – lateral spine of S1-4 at different ages.....                 | 5 |
| Figure S6: Progression of skeletal dysplasia – pelvis of S1-4 at different ages .....                       | 5 |
| Table S1: Results of DMB urine electrophoresis in S1 (age 11 and 16 years) and S2 (age 14 years) .....      | 6 |
| Table S2: Results of LC-MS/MS analysis of urine and plasma in S1 (age 17 years) and S2 (age 15 years) ..... | 6 |
| Table S3: ARSK-associated skeletal phenotype .....                                                          | 7 |

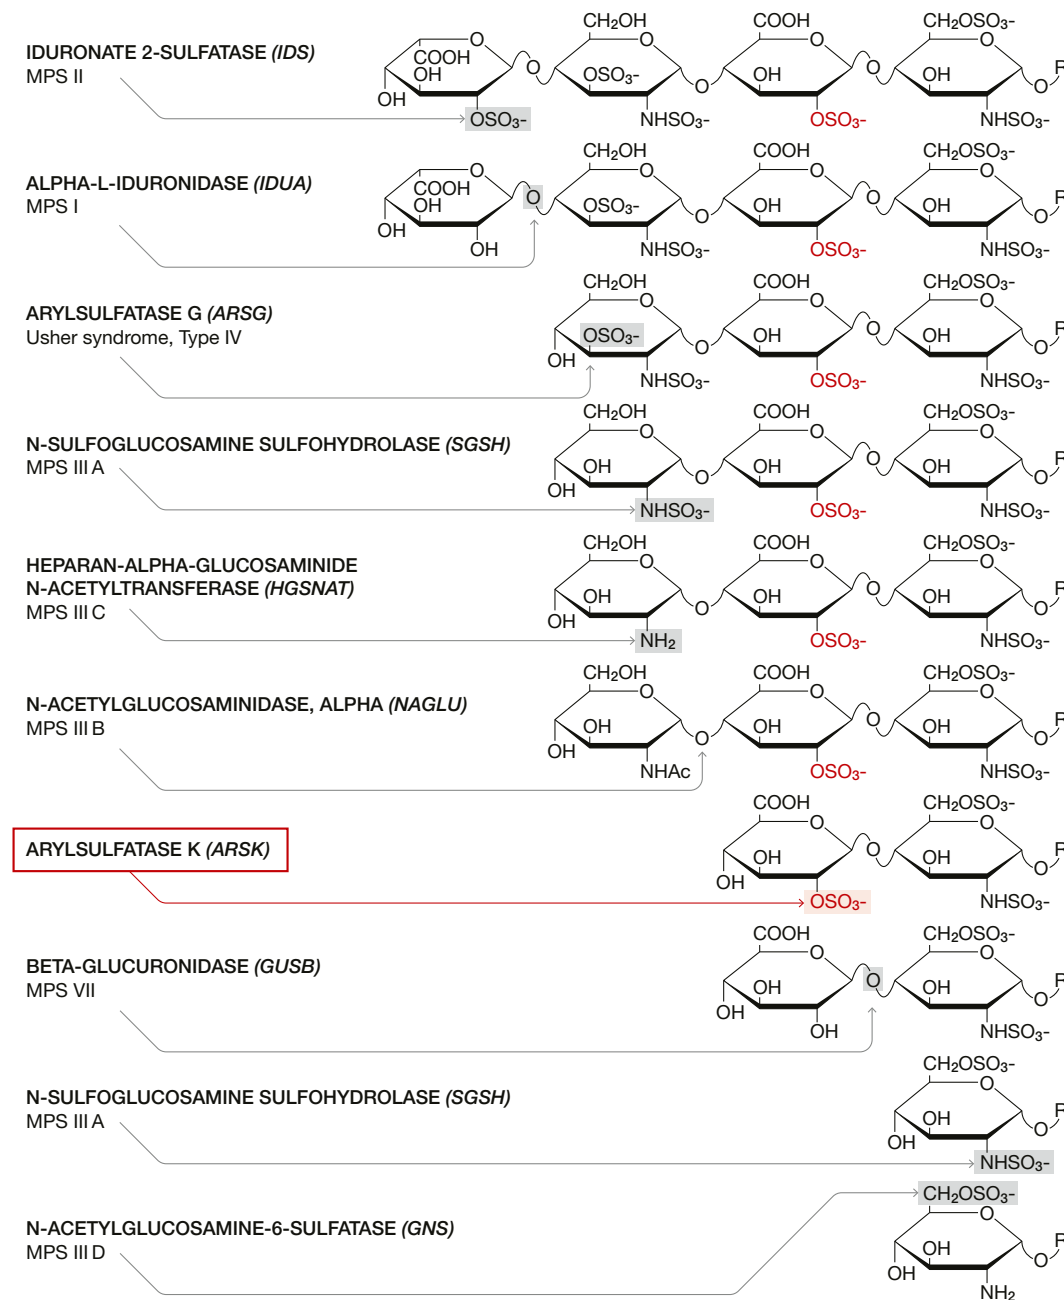

Figure S1: The role of ARSK in heparan sulfate degradation as an example for GAG degradation

ARSK removes the 2-O-sulfate group from 2-sulfoglucuronate. This figure, showing GAG degradation with the example of heparan sulfate, is adapted with permission from Dhamale et al. (2017)[1], © 2017, American Chemical Society.

|             |                           |     |
|-------------|---------------------------|-----|
| ARSA        | SLCTPSRAALLTGRLPV         | 83  |
| ARSB        | PLCTPSRSQLLTGRYQI         | 105 |
| ARSC        | PLCTPSRAAFMTGRYPV         | 89  |
| ARSD        | PLCTPSRAAFLTGRHSF         | 103 |
| ARSE        | SLCTPSRAAFLTGRYPV         | 100 |
| ARSF        | SLCSPSRSAFLTGRYPV         | 93  |
| ARSG        | STCSPSRSASLLTGRLGL        | 98  |
| ARSH        | SMCTPSRAAFLTGRYPV         | 69  |
| ARSI        | PICTPSRSQLLTGRYQI         | 107 |
| ARSJ        | PICTPSRSQFITGKYQI         | 136 |
| GALNS       | PLCSPSRAALLTGRLPI         | 93  |
| GNS         | ALCCPSRASILTGKYPH         | 105 |
| SGSH        | SSCSPSRSASLLTGLPQR        | 84  |
| SULF1       | PMCCPSRSSMLTGKYVH         | 101 |
| SULF2       | PMCCPSRSSILTGKYVH         | 102 |
| IDS         | AVCAPSRVSFLTGRRPD         | 98  |
| <b>ARSK</b> | <b>PICCP</b> SRAAMWSGLFTH | 94  |
|             | * *                       |     |

Figure S2: Conserved sulfatase signature

The arginine in the CxPxR-motif is unexceptionally conserved in all human sulfatases indicating its relevance in formylglycine modification and catalytic activity.

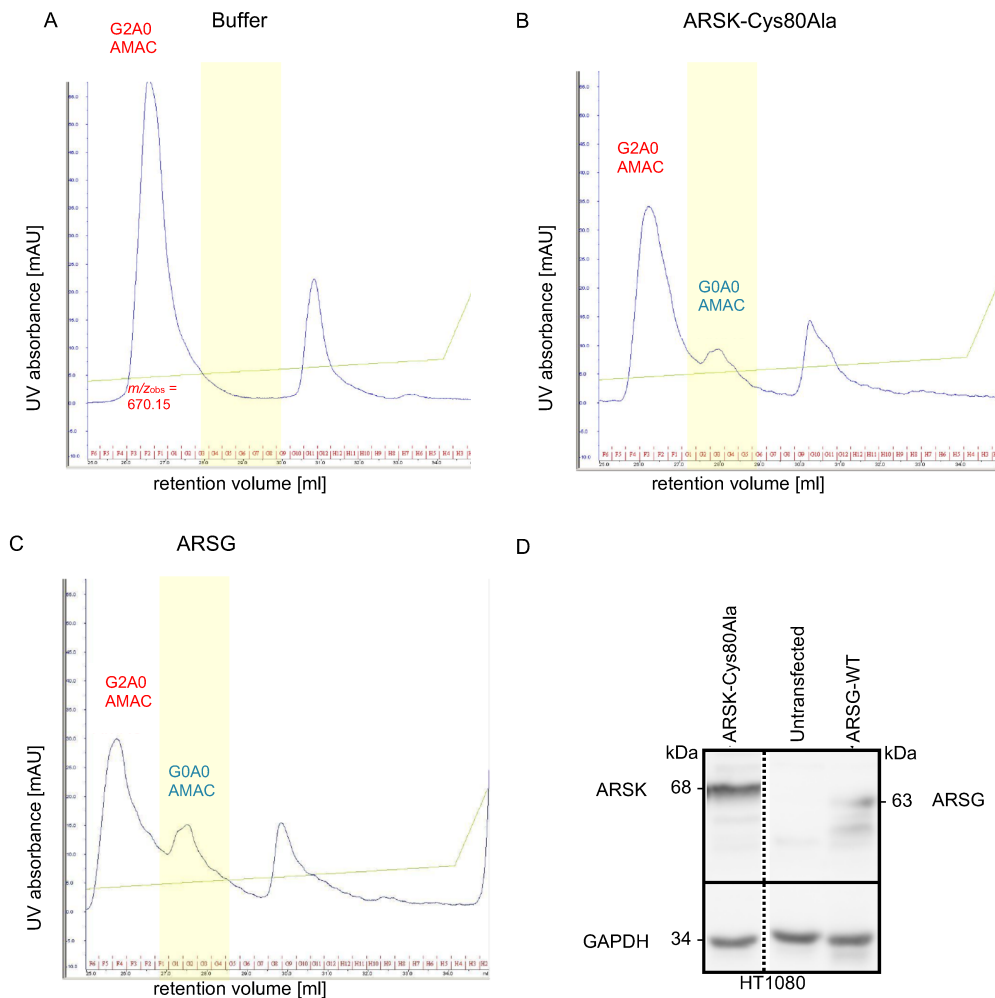

Figure S3: Functional consequences of ARSK variants - additional measurements

ARSK-Cys80Ala and ARSG did not desulfate the synthetic G2A0 disaccharides. Incubation of the AMAC-labeled G2A0 disaccharide with buffer only as control (a) resulted in a major peak of the unreacted educt ( $m/z$  670.15) and ubiquitous peak at a retention volume > 30 ml). Incubation of AMAC-labeled G2A0 with ARSK-Cys80Ala (b) and ARSG (c) resulted in minor G0A0 product peaks, which might be attributed to the activity of endogenous HT1080 ARSK rather than to ectopic expression of ARSK-Cys80Ala or ARSG, respectively. (d) Western blot analysis: Expression of ARSK-Cys80Ala in HT1080 cell lysates. No expression in untransfected or ARSG-transfected cells. GAPDH was used as loading control.



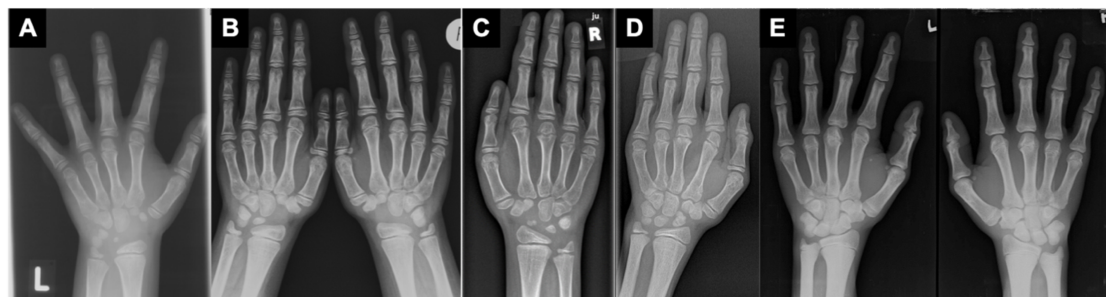

Figure S4: Progression of skeletal dysplasia – hands of S1-4 at different ages

Hand radiographs of affected individuals demonstrate short third, fourth and fifth metacarpals, small carpal bones and small epiphyses of lower ends of radius and ulna. S1 at 10 years (A) and 12 years (B), S2 at 14 years (C), S4 at 17 years (D), S3 at 18 years (E)

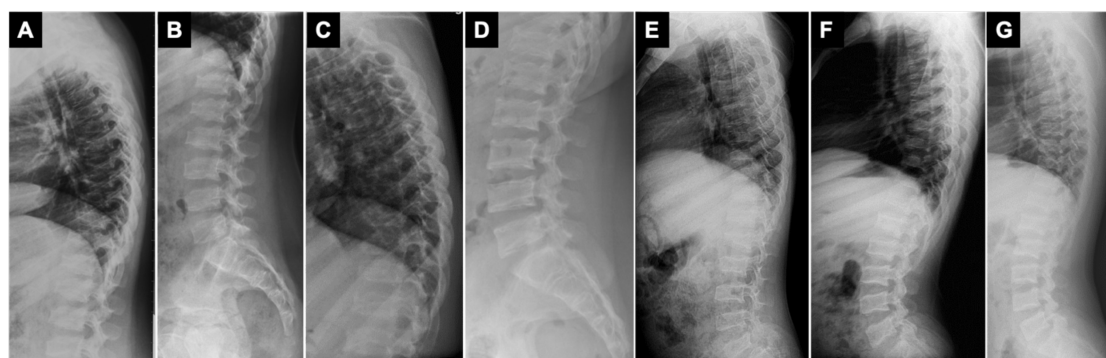

Figure S5: Progression of skeletal dysplasia – lateral spine of S1-4 at different ages

Radiographs of lateral spine illustrate platyspondyly, anterior beaking and irregular vertebral end plates. S1 at 12 years (A, B), S2 at 14 years (C), S1 at 17 years (D), S4 at 17 years (E), S3 at 18 years (F) and at 20 years (G)

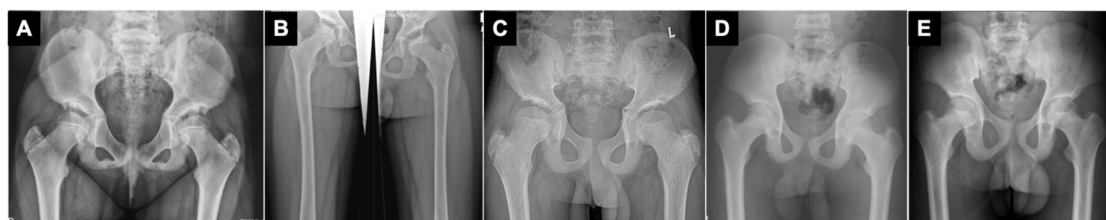

Figure S6: Progression of skeletal dysplasia – pelvis of S1-4 at different ages

Pelvic radiographs of affected individuals demonstrate irregular acetabular roofs, reduced hip joint space and small capital femoral epiphyses. S1 at 12 years (A), S2 at 14 years (B), S4 at 17 years (C), S3 at 18 years (D) and at 20 years (E)

Table S1: Results of DMB urine electrophoresis in S1 (age 11 and 16 years) and S2 (age 14 years)

|                                         | DMB urine analysis             |                                |                                |
|-----------------------------------------|--------------------------------|--------------------------------|--------------------------------|
|                                         | S1 (at 11 years)* <sup>1</sup> | S1 (at 16 years)* <sup>2</sup> | S2 (at 14 years)* <sup>2</sup> |
| GAG mg /creatinine mmol<br>(DMB method) | 8.9 mg/mmol                    | 7 mg/mmol                      | 18 mg/mmol                     |
|                                         | expected <18 mg/mmol           | expected ≤10 mg/mmol           | expected ≤18 mg/mmol           |
| Chondroitin sulfate                     | 67%                            | 78%                            | <b>93% ↑</b>                   |
|                                         | expected 70-80%                | expected 70-80%                | expected 70-80%                |
| Heparan sulfate                         | 9%                             | 22%                            | 7%                             |
|                                         | expected 20-30%                | expected 20-30%                | expected 20-30%                |
| Keratan sulfate                         | <b>24%</b>                     | not detected                   | not detected                   |
|                                         | expected undetectable          | expected undetectable          | expected undetectable          |

\*1: analyses performed at the Center of Pathobiochemistry and Genetics, Medical University of Vienna, Austria

\*2: analysis performed at the Laboratory of Metabolic Diseases, Department of Pediatrics and Adolescent Medicine, Medical University of Graz, Austria

Table S2: Results of LC-MS/MS analysis of urine and plasma in S1 (age 17 years) and S2 (age 15 years)

|                             | LC-MS/MS urine analysis* <sup>3</sup> |                                 | LC-MS/MS plasma analysis* <sup>3</sup>                             |                  |
|-----------------------------|---------------------------------------|---------------------------------|--------------------------------------------------------------------|------------------|
|                             | S1 (at 17 years)                      | S2 (at 15 years)                | S1 (at 17 years)                                                   | S2 (at 15 years) |
| Dermatan sulfate            | <b>165 µg/mmol creatinine ↑</b>       | <b>234 µg/mmol creatinine ↑</b> | 42 ng/ml                                                           | 39 ng/ml         |
|                             | expected 0-53 µg/mmol creatinine      |                                 | average in reference samples: 34 ng/ml, range 8 - 131 ng/ml        |                  |
| Heparan sulfate             | 230 µg/mmol creatinine                | 288 µg/mmol creatinine          | 131 ng/ml                                                          | 146 ng/ml        |
|                             | expected 0-323 µg/mmol creatinine     |                                 | average in reference samples: 257.2 ng/ml, range 66 - 1346 ng/ml   |                  |
| Keratan sulfate             | 60 µg/mmol creatinine                 | 239 µg/mmol creatinine          | 839 ng/ml                                                          | 2146 ng/ml       |
|                             | expected 0-314 µg/mmol creatinine     |                                 | average in reference samples: 1017.1 ng/ml, range 457 - 2442 ng/ml |                  |
| Total GAG content in plasma |                                       |                                 | 1012 ng/ml                                                         | 2330 ng/ml       |
|                             |                                       |                                 | average in reference samples 1308.3 ng/ml, range 619 - 2691 ng/ml  |                  |

\*3: analysis performed at the Laboratory Genetic Metabolic Diseases, Amsterdam UMC, University of Amsterdam, Departments of Clinical Chemistry and Pediatrics, Core Facility Metabolomics, Emma Children's Hospital, Amsterdam Gastroenterology Endocrinology Metabolism, Amsterdam, The Netherlands

Table S3: ARSK-associated skeletal phenotype

| <b>ARSK-associated skeletal phenotype in comparison to radiologic MPS-specific features</b> |                                                                          |                                                                                    |           |           |                                 |                                                                 |
|---------------------------------------------------------------------------------------------|--------------------------------------------------------------------------|------------------------------------------------------------------------------------|-----------|-----------|---------------------------------|-----------------------------------------------------------------|
| <b>Radiologic MPS specific features[2-6]</b>                                                | <b>S1</b>                                                                | <b>S2</b>                                                                          | <b>S3</b> | <b>S4</b> | <b>Subject specific details</b> |                                                                 |
| Skull                                                                                       | Thickened cortical bone of the calvaria                                  | x                                                                                  | x         | x         | x                               |                                                                 |
| Spine                                                                                       | Rounded or bullet-shape vertebral bodies                                 | -                                                                                  | -         | -         | -                               | Irregular vertebral end plates                                  |
|                                                                                             | Platyspondyly                                                            | x                                                                                  | x         | x         | x                               |                                                                 |
|                                                                                             | Anterior inferior beaking of the thoracolumbar vertebrae                 | x                                                                                  | x         | x         | x                               |                                                                 |
|                                                                                             | Posterior scalloping of the vertebral bodies.                            | x                                                                                  | x         | x         | x                               |                                                                 |
|                                                                                             | Thoracolumbar junction kyphosis                                          | -                                                                                  | -         | -         | -                               |                                                                 |
|                                                                                             | Kyphosis with gibbus                                                     | -                                                                                  | -         | -         | -                               |                                                                 |
|                                                                                             | Hyperlordosis                                                            | -                                                                                  | -         | x         | x                               |                                                                 |
|                                                                                             | Scoliosis                                                                | -                                                                                  | x         | -         | x                               |                                                                 |
|                                                                                             | Spinal cord compression                                                  | -                                                                                  | -         | -         | -                               |                                                                 |
|                                                                                             | Hip/pelvis                                                               | Poor development of acetabulum and medial proportion of proximal femoral epiphysis | x         | x         | x                               |                                                                 |
| Severe hip dysplasia                                                                        |                                                                          | x                                                                                  | x         | x         | x                               |                                                                 |
| Hands/feet                                                                                  | Carpal and tarsal bones are hypoplastic and irregularly shaped           | x                                                                                  | x         | x         | x                               | Short third, fourth and fifth metacarpals                       |
|                                                                                             | Metacarpal bones are proximally pointed, shortened and thickened         | x                                                                                  | x         | x         | x                               |                                                                 |
| Long bones                                                                                  | Hypoplastic and thinned epiphyses cortically with osteoporosis           | x                                                                                  | x         | x         | x                               | Small epiphyses of lower ends of radius, ulna and capital femur |
|                                                                                             |                                                                          | x                                                                                  | x         | x         | x                               |                                                                 |
| Chest/ribs                                                                                  | Abnormally shaped ribs, spatulate ribs, broadening of clavicles and ribs | x                                                                                  | x         | x         | x                               |                                                                 |

## References

- 1 Dhamale OP, Lawrence R, Wiegmann EM, Shah BA, Al-Mafraji K, Lamanna WC, Lubke T, Dierks T, Boons GJ, Esko JD. Arylsulfatase K is the Lysosomal 2-Sulfoglucuronate Sulfatase. *ACS Chem Biol* 2017;12(2):367-373.
- 2 Oussoren E, Wagenmakers EM, Link B, van der Meijden JC, Pijnappel W, Ruijter GJG, Langeveld M, van der Ploeg AT. Hip disease in Mucopolysaccharidoses and Mucopolipidoses: A review of mechanisms, interventions and future perspectives. *Bone* 2021;143:115729.
- 3 Nicolas-Jilwan M, AlSayed M. Mucopolysaccharidoses: overview of neuroimaging manifestations. *Pediatr Radiol* 2018;48(10):1503-1520.
- 4 Spina V, Barbuti D, Gaeta A, Palmucci S, Soscia E, Grimaldi M, Leone A, Manara R, Polonara G. The role of imaging in the skeletal involvement of mucopolysaccharidoses. *Ital J Pediatr* 2018;44(Suppl 2):118.
- 5 Melbouci M, Mason RW, Suzuki Y, Fukao T, Orii T, Tomatsu S. Growth impairment in mucopolysaccharidoses. *Mol Genet Metab* 2018;124(1):1-10.
- 6 White KK. Orthopaedic aspects of mucopolysaccharidoses. *Rheumatology (Oxford)* 2011;50 Suppl 5:v26-33.
